# Supplementary material for: Human Papilloma Virus Circulating Cell-Free DNA Kinetics in Cervical Cancer Patients Undergoing Definitive Chemoradiation
Source: bioRxiv or medRxiv preprint supplement (doi:10.1101/2024.06.28.24309678), 2024-06-30
Supplement: Supplementary file [file media-1.pdf]

# Human Papilloma Virus Circulating Cell-Free DNA Kinetics in Cervical Cancer Patients Undergoing Definitive Chemoradiation

Aaron Seo,<sup>1</sup> Weihong Xiao,<sup>2</sup> Olsi Gjyshi,<sup>1</sup> Kyoko Yoshida-Court,<sup>1</sup> Peng Wei,<sup>3</sup> David Swanson,<sup>3</sup> Tatiana Cisneros Napravnik,<sup>1</sup> Adam Grippin,<sup>1</sup> Aradhana M Venkatesan,<sup>4</sup> Megan C Jacobsen,<sup>5</sup> David T Fuentes,<sup>5</sup> Erica Lynn,<sup>1</sup> Julie Sammouri,<sup>1</sup> Anuja Jhingran,<sup>1</sup> Melissa Joyner,<sup>1</sup> Lilie L Lin<sup>1</sup>, Lauren E Colbert,<sup>1</sup> Maura L Gillison,<sup>2</sup> Ann H Klopp<sup>1\*</sup>

1 Department of Radiation Oncology, University of Texas MD Anderson Cancer Center, Houston, TX

2 Department of Thoracic-Head & Neck Med Onc, University of Texas MD Anderson Cancer Center, Houston, TX

3 Department of Biostatistics, University of Texas MD Anderson Cancer Center, Houston, TX

4 Department of Abdominal Imaging, Division of Diagnostic Imaging, University of Texas MD Anderson Cancer Center, Houston, TX

5 Department of Imaging Physics, University of Texas MD Anderson Cancer Center, Houston, TX

First Author: Aaron Seo (aseo@mdanderson.org)

\*Corresponding Author: Ann Klopp (aklopp@mdanderson.org)

## Supplementary Figures and Tables

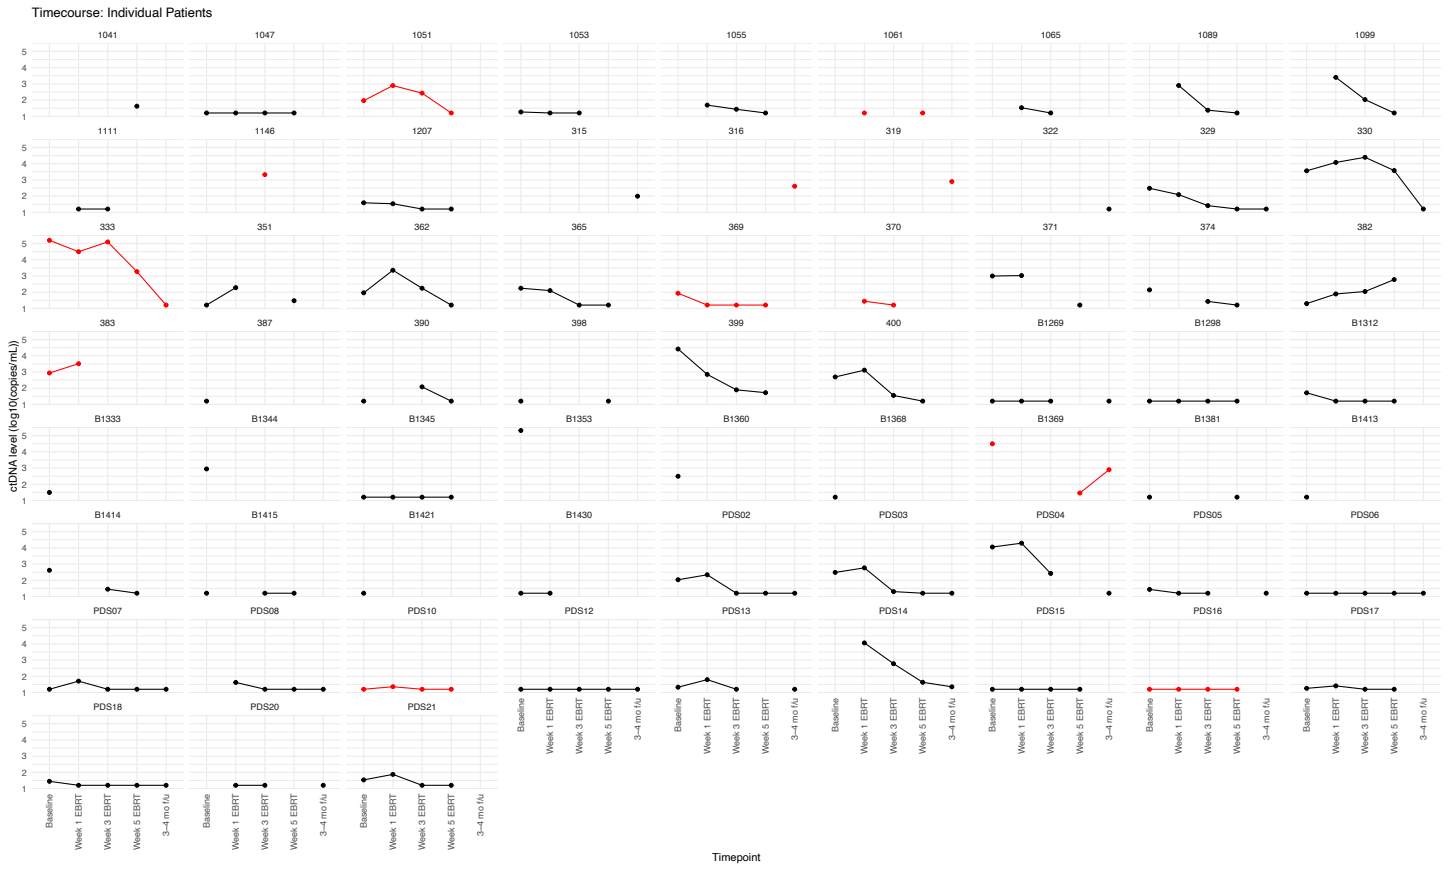

**Supplementary Figure 1.** Individual timecourse plots of ctDNA levels before, during, and after chemORT. Red indicates patients who had an eventual recurrence.

**A**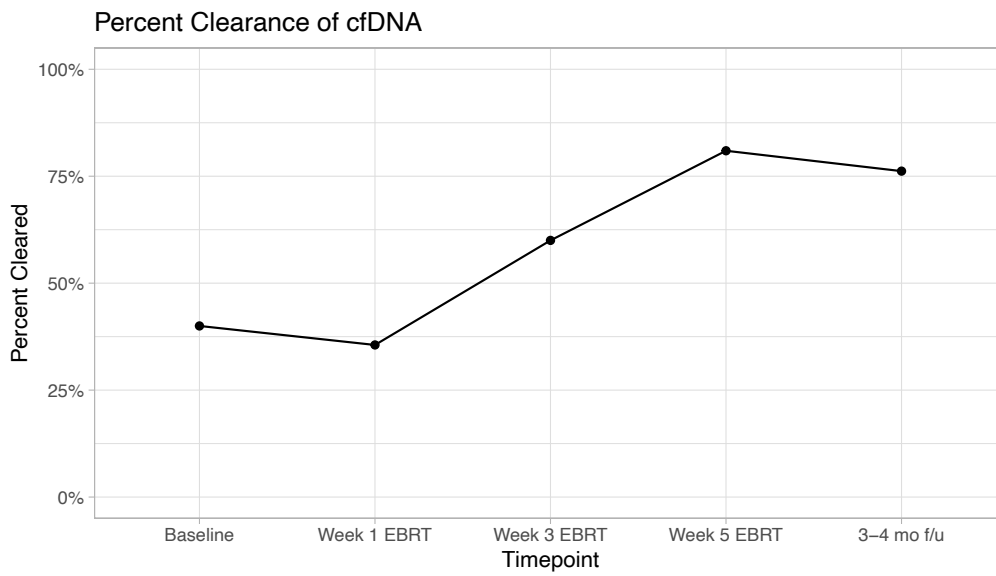**B**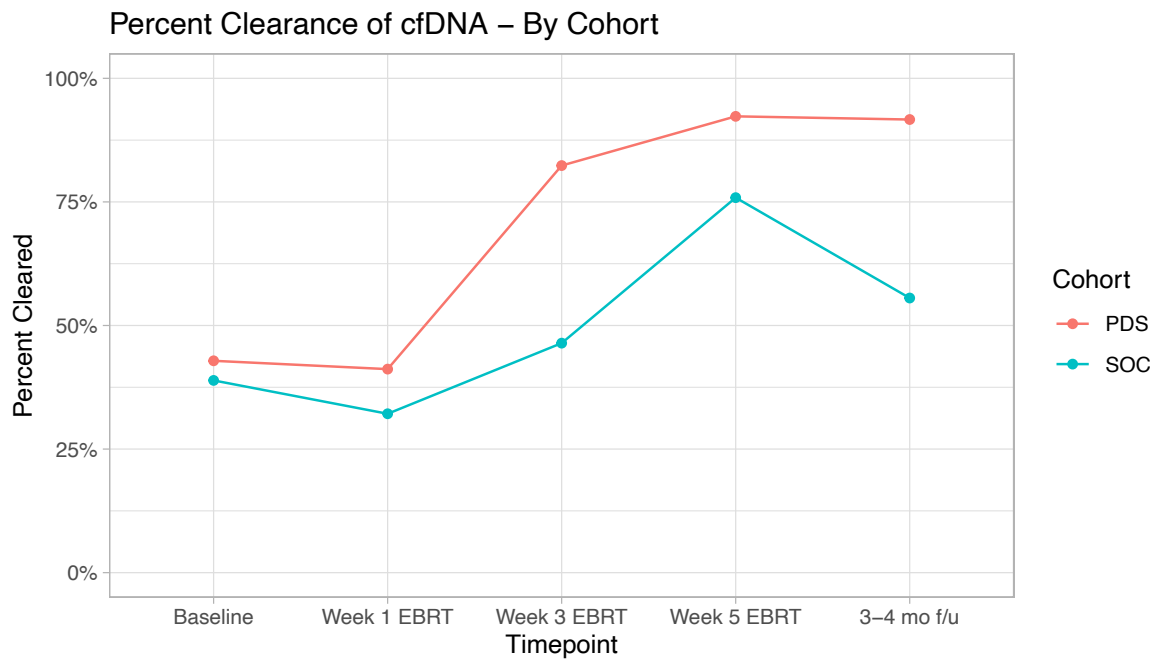

**Supplementary Figure 2.** Percent clearance of HPV cfDNA of all HPV types (A) overall and (B) by cohort.

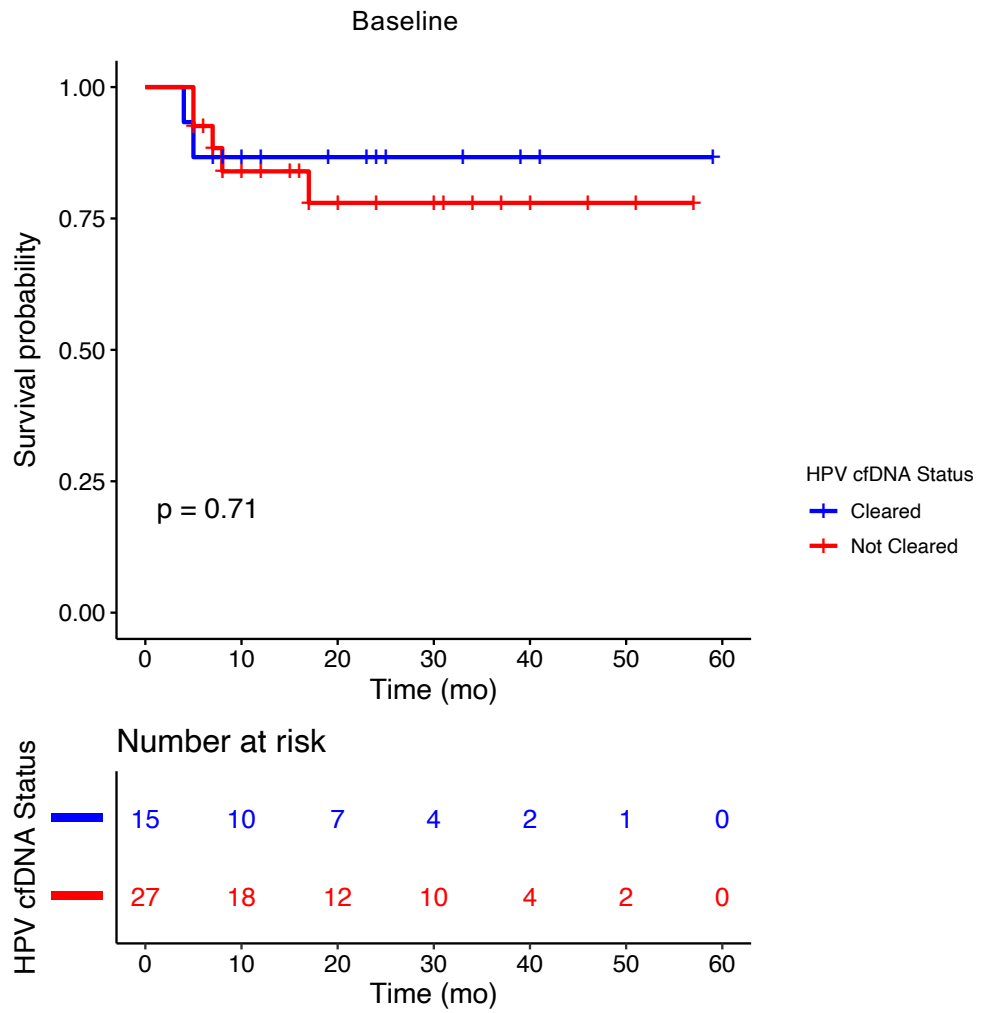

**Supplementary Figure 3.** Kaplan-Meier Analysis of Recurrence-Free Survival by Baseline ctDNA status. The logrank test p-value is reported.

| Variable                            | Univariable                   |               | Multivariable                                  |               |
|-------------------------------------|-------------------------------|---------------|------------------------------------------------|---------------|
|                                     | HR (95% CI, p-value)          | C-index       | HR (95% CI, p-value)                           | C-index       |
| Follow-up ctDNA (log10-transformed) | 7.21 (1.79-29.0, p=0.0054)    | 0.828 ± 0.116 | 9.54 (0.920-99.0, p=0.0588)                    | 0.881 ± 0.098 |
| MRI GTV treatment response          | 0.240 (0.00505-11.4, p=0.468) | 0.601 ± 0.09  | 0.0104 (1.81x10 <sup>-9</sup> -60016, p=0.566) |               |

**Supplementary Table 2.** Univariable and Multivariable Cox Regression Analyses and C-indices for Recurrence-free Survival.
